# Supplementary material
Source: publisher figshare collection journal article supplement (https://geolsoc.figshare.com/ndownloader/files/28692042)
Supplement: Supplementary file 1 [file 28692042]

## Sheet: List1
Supplementary material 2. Representative trace element compositions (ppm) of olivine from sample P12/6 (Chintalampalle pipe, Wajrakarur kimberlite field, Eastern Dharwar Craton) determined by LA-ICP-MS
	Li	Na	Al	P	Ca	Sc	Ti	V	Cr	Mn	Co	Ni	Cu	Zn	Ga	Zr	Nb	Ta
Li type I	0.371	<20	<1	7.74	62.38	2.92	13.12	0.791	14.88	798.25	119.55	2562.43	<0.2	46.65	<0.02	0.1063	4.14	0.1127
Li type I	0.205	<20	<1	10.07	49.15	2.59	7.51	0.681	11.61	645.94	103.98	2264.36	<0.2	38.05	<0.02	0.1147	3.51	0.1023
Li type I	0.512	<20	<1	10.11	84.95	2.55	6.25	0.893	12.48	631.88	106.94	2324.09	<0.2	37.51	<0.02	0.1021	3.15	0.09
Li type I	0.335	<20	<1	8.5	58.29	2.62	7.23	0.657	12.01	677.54	108.08	2329.51	<0.2	39.34	<0.02	0.1019	3.73	0.0913
Li type I	0.423	<20	<1	8.93	53.34	2.8	5.23	0.656	11.4	660.26	106.27	2289.36	<0.2	39.52	<0.02	0.113	3.98	0.1052
Li type I	0.552	27.1	<1	10.04	73.96	2.74	7.81	0.691	12.9	698.83	109.22	2313.82	<0.2	41.05	<0.02	0.156	4.04	0.0986
Li type I	0.412	<20	<1	9.44	54.99	2.74	17.37	0.84	16.33	802.59	117.29	2434.47	<0.2	45.47	<0.02	0.1173	3.8	0.1089
Li type I	0.775	26.5	<1	11.26	68.81	2.73	14.29	0.754	14.56	759.03	112.63	2385.77	<0.2	43.24	<0.02	0.1486	4.58	0.1379
Li type I	0.715	<20	<1	11.86	77.62	2.86	10.1	0.759	13.58	752.88	114.31	2393.85	<0.2	44.74	<0.02	0.1462	4	0.1308
Li type I	0.199	<20	<1	9.27	57.55	2.84	9.79	0.748	13.39	766.49	113.82	2433.4	<0.2	43.34	<0.02	0.1357	5.63	0.1061
Li type I	0.474	<20	<1	10.5	54.38	2.54	25.38	0.858	19.81	845.06	117.41	2301	<0.2	44.79	<0.02	0.177	4.03	0.153
Li type I	0.443	23.19	<1	11.58	111.74	2.58	25.12	0.906	18.96	850.17	121.47	2388.47	<0.2	46.78	<0.02	0.31	4.35	0.1536
Li type I	0.557	<20	<1	10.56	70.69	2.71	19.36	0.781	18.61	851.57	122.79	2444.15	<0.2	45.96	<0.02	0.246	5.35	0.1642
Li type I	0.638	<20	<1	9.48	57.56	2.7	20.25	0.79	15.7	808.24	118.03	2441.6	<0.2	46.41	<0.02	0.258	4.7	0.1496
Li type I	0.737	25.5	<1	10.3	63.35	2.91	8.42	0.726	12.58	722.03	112.86	2366.75	<0.2	43.95	<0.02	0.1244	4.23	0.1083
Li type I	0.941	30.5	<1	10.03	82.93	2.82	6.23	0.67	12.93	683.68	111.5	2373.71	<0.2	41.78	<0.02	0.261	4.65	0.1075
Li type I	0.64	<20	<1	8.98	55.46	2.89	9.89	0.745	13.9	735.05	114.33	2388.55	<0.2	43.47	<0.02	0.1555	4.58	0.1119
Li type I	0.555	<20	<1	8.73	55.49	2.68	18.6	0.745	15.56	788.23	115.76	2408.62	<0.2	45.65	<0.02	0.1568	4.05	0.1531
Li type II	1.75	124.67	52.58	30.9	233.13	1.395	184.42	5.99	378.04	917.49	150.36	2666.83	1.94	79.12	0.1357	0.542	0.1143	0.00854
Li type II	1.71	125.88	53.94	26.46	195.14	1.386	185.68	5.89	370.62	877.83	145.8	2547.59	2.09	77.34	0.1279	0.552	0.1116	0.00778
Li type II	1.75	125.86	55.27	27.34	193.59	1.403	186.1	5.79	364.68	868.45	146.2	2553.76	2.03	78.09	0.1267	0.549	0.1112	0.00891
Li type II	1.73	129.23	55.04	26.11	197	1.377	185.6	5.84	367.65	878.88	146.74	2534.15	1.99	76.96	0.1314	0.565	0.1351	0.00744
Li type II	1.71	123.74	54.55	26.83	193.26	1.415	184.9	5.74	367.94	862.27	144.54	2541.06	1.97	76.04	0.1299	0.556	0.1024	0.00729
Li type II	1.72	135.67	55.95	32.45	270.92	1.43	190.63	5.95	375.77	923.56	148.29	2624.29	1.99	77.35	0.159	0.552	0.1126	0.00815
Li type II	1.67	124.05	53.33	27.78	191.86	1.347	182.19	5.66	365.1	864.02	143.14	2555.21	1.94	76.68	0.138	0.596	0.1209	0.0088
Li type II	1.82	125.37	55.81	29.82	195.39	1.4	185.79	5.81	366.92	878.11	147.4	2636.53	2.03	77.86	0.152	0.573	0.1152	0.00872
Li type II	1.79	130.26	54.99	27.27	281.72	1.39	186.34	5.96	376.16	925.27	147.6	2571.86	2.81	75.92	0.151	0.562	0.1193	0.00905
Reference material
BCR-2G	9.95	22312.3	76320.8	1396.5	49897.2	35.12	14898.8	424.61	14.51	1505.91	36.97	11.72	15.28	139.7	20.49	189.7	11.72	0.734
BCR-2G	10.03	22830.4	77235.9	1452.81	51365.9	35.93	15431.9	438.3	14.9	1560.19	37.99	11.44	15.84	142.79	21.37	192.62	11.86	0.742
BCR-2G	9.68	22434.1	77857.6	1474.68	51426.9	36.34	15591.3	436.44	14.81	1549.32	37.87	11.94	15.74	139.81	21.02	192.88	11.9	0.765
BCR-2G	9.5	22582.4	78558.4	1514.15	51318.6	36.8	15679.2	435.43	14.92	1543.99	37.97	13.07	15.61	135.9	20.9	202.31	12.26	0.787
The characteristics of Li type I and Li type II are given in the text.
